# Supplementary material
Source: publisher figshare collection journal article supplement (https://plos.figshare.com/articles/dataset/_/5275351)
Supplement: Supplementary file 1 [file 1]

Archive with 9 entries (9 files):
- pone.0182503.s001.pdf
- pone.0182503.s002.pdf
- pone.0182503.s003.pdf
- pone.0182503.s004.pdf
- pone.0182503.s005.pdf
- pone.0182503.s006.pdf
- pone.0182503.s007.pdf
- pone.0182503.s008.pdf
- pone.0182503.s009.pdf
