# Supplementary material
Source: publisher figshare collection journal article supplement (https://plos.figshare.com/articles/dataset/_/5275351)
Supplement: Supplementary file 1 [file 1 › pone.0182503.s002.pdf]

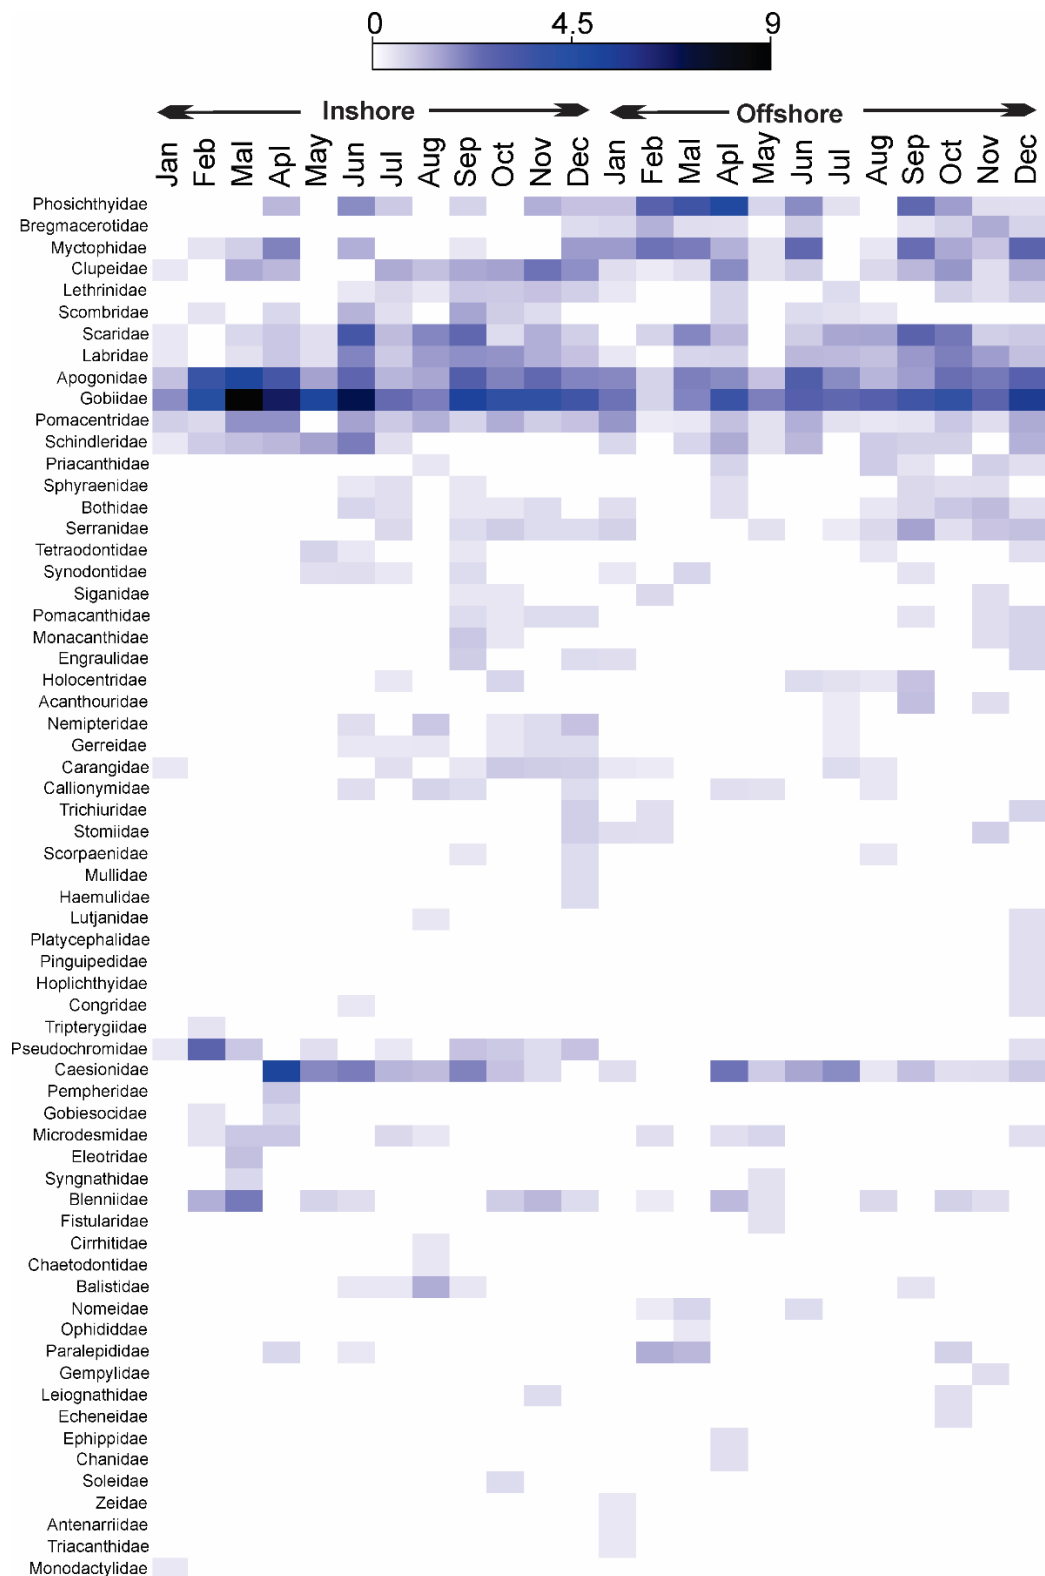

**S2 Fig. List of the encountered families.** Shade plot of square-root transformed abundances for the families encountered in the monthly collections. Linear color-scale is proportional to the square root transformed abundances of each taxon.
