# Supplementary material
Source: publisher figshare collection journal article supplement (https://plos.figshare.com/articles/dataset/_/5275351)
Supplement: Supplementary file 1 [file 1 › pone.0182503.s005.pdf]

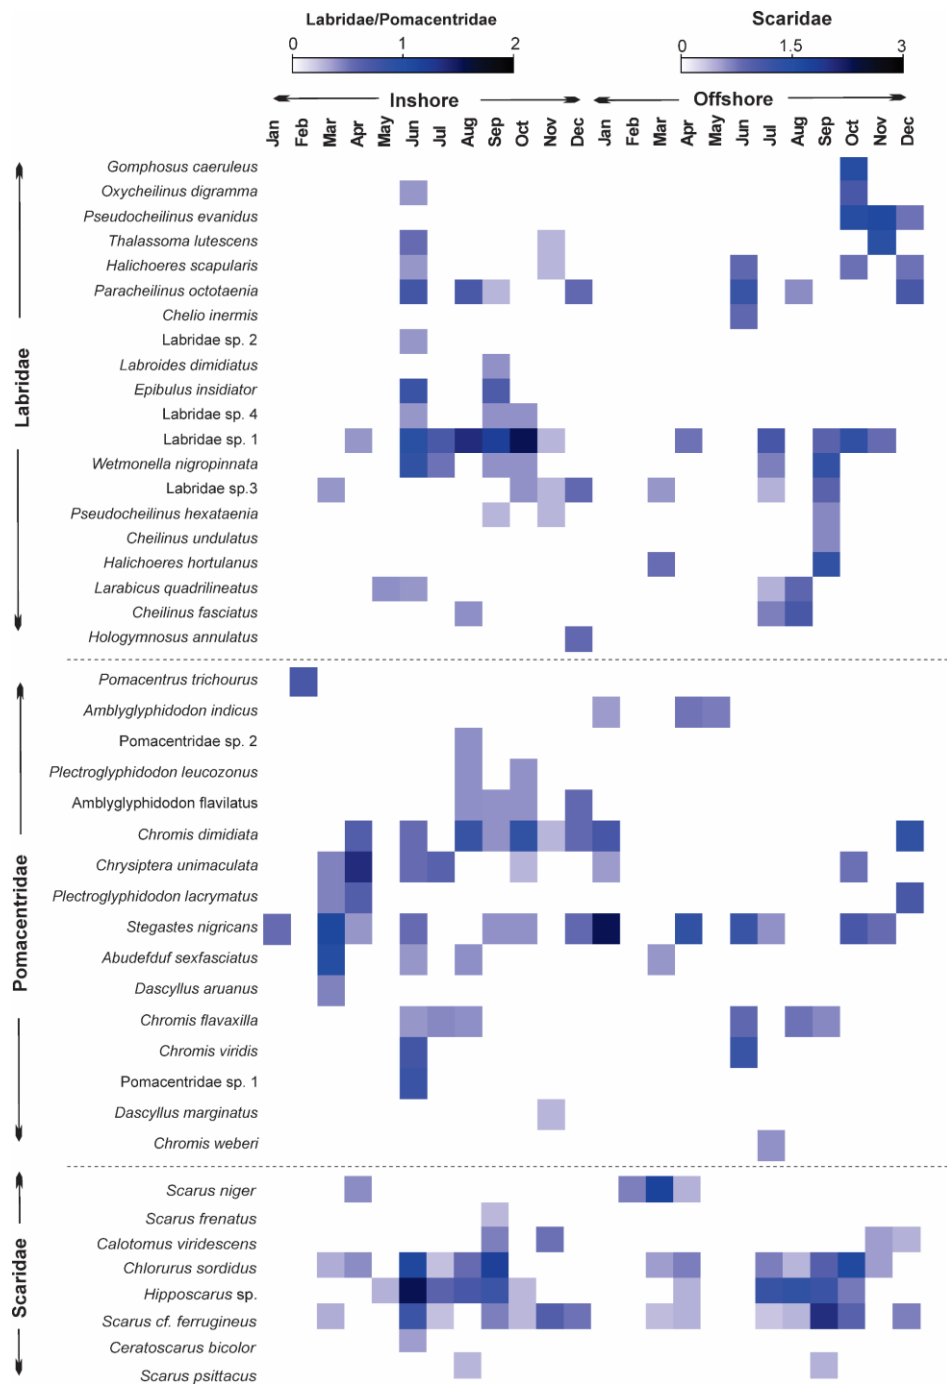

**S5 Fig. Abundance of labrid, pomacentrid and scarid taxa in the samples.** Shade plot of square-root transformed abundances for the species of the families Labridae, Pomacentridae and Scaridae encountered in the monthly collections. Linear color-scales are proportional to the square root transformed abundances of each taxon (please note the difference in scale for the family Scaridae).
