# Supplementary material
Source: publisher figshare collection journal article supplement (https://plos.figshare.com/articles/dataset/_/5275351)
Supplement: Supplementary file 1 [file 1 › pone.0182503.s006.pdf]

**S1 Table. Dates of ichthyoplankton sampling.**

|     | 1 | 2 | 3 | 4 | 5 | 6 | 7 | 8 | 9 | 10 | 11 | 12 | 13 | 14 | 15 | 16 | 17 | 18 | 19 | 20 | 21 | 22 | 23 | 24 | 25 | 26 | 27 | 28 | 29 | 30 | 31 |
|-----|---|---|---|---|---|---|---|---|---|----|----|----|----|----|----|----|----|----|----|----|----|----|----|----|----|----|----|----|----|----|----|
| Jan |   |   |   |   | ☾ |   |   |   |   |    | ●  |    |    |    |    |    |    |    | ☾  | ■  |    |    |    |    |    |    | ○  |    |    |    |    |
| Feb |   |   | ☾ |   |   |   |   |   |   | ●  |    |    |    |    |    |    | ☾  |    |    |    |    |    |    | ■  | ○  |    |    |    |    |    |    |
| Mar |   |   |   |   | ☾ |   |   |   |   |    | ●  |    |    |    |    |    | ☾  |    | ☾  |    |    |    |    |    |    | ○  |    |    |    |    |    |
| Apr |   |   | ☾ |   |   |   |   |   |   | ●  |    |    |    |    | ■  |    |    | ☾  |    |    |    |    |    |    | ○  |    |    |    |    |    |    |
| May |   | ☾ |   |   |   |   |   |   |   | ●  |    |    |    |    | ■  |    |    | ☾  |    |    |    |    |    |    | ○  |    |    |    |    |    | ☾  |
| Jun |   |   |   |   |   |   |   | ● |   |    |    |    |    |    |    | ☾  |    |    | ■  |    |    |    | ○  |    |    |    |    |    |    |    | ☾  |
| Jul |   |   |   |   |   |   |   | ● |   |    |    |    |    |    |    | ☾  |    |    |    |    |    | ○  |    | ■  |    |    |    |    | ☾  |    |    |
| Aug |   |   |   |   |   |   | ● |   |   |    |    |    |    | ☾  |    |    | ■  |    | ☾  |    |    | ○  |    |    |    |    |    | ☾  |    |    |    |
| Sep |   |   |   |   | ● |   |   |   |   |    |    | ☾  |    |    |    | ■  |    |    | ○  |    |    |    |    |    |    |    | ☾  |    |    |    |    |
| Oct |   |   |   |   | ● |   |   |   |   |    |    | ☾  |    |    |    |    |    |    | ○  |    |    | ■  |    |    |    |    | ☾  |    |    |    |    |
| Nov |   |   |   |   | ● |   |   |   |   | ☾  |    |    |    |    |    |    | ○  |    |    |    |    |    |    |    |    | ☾  |    |    |    |    |    |
| Dec |   |   | ● |   |   |   |   |   | ☾ |    |    |    |    |    |    |    | ○  | ■  |    |    |    |    |    |    | ☾  |    |    |    |    |    |    |

Dates of sampling (marked with yellow) compared to the lunar phase (●: new moon, ☾: first quarter, ○: full moon, ☾: third quarter).
