# Supplementary material
Source: publisher figshare collection journal article supplement (https://plos.figshare.com/articles/dataset/_/5275351)
Supplement: Supplementary file 1 [file 1 › pone.0182503.s007.pdf]

**S2 Table. Primers used for the DNA barcoding.** COI amplification in our study was done by the use of Fish cocktail primers.

**Fish cocktail (M13 tailed): C\_FishF1t1–C\_FishR1t1 (Ratio 1:1:1:1) [1]**

---

|        |                                             |
|--------|---------------------------------------------|
| VF2_t1 | TGTAAAACGACGGCCAGTCAACCAACCACAAAGACATTGGCAC |
|--------|---------------------------------------------|

|           |                                             |
|-----------|---------------------------------------------|
| FishF2_t1 | TGTAAAACGACGGCCAGTCGACTAATCATAAAGATATCGGCAC |
|-----------|---------------------------------------------|

|           |                                             |
|-----------|---------------------------------------------|
| FishR2_t1 | CAGGAAACAGCTATGACACTTCAGGGTGACCGAAGAATCAGAA |
|-----------|---------------------------------------------|

|         |                                             |
|---------|---------------------------------------------|
| FR1d_t1 | CAGGAAACAGCTATGACACCTCAGGGTGTCCGAARAAYCARAA |
|---------|---------------------------------------------|

**Sequencing primers for M13-tailed PCR products [2]**

---

|      |                    |
|------|--------------------|
| M13F | TGTAAAACGACGGCCAGT |
|------|--------------------|

|      |                   |
|------|-------------------|
| M13R | CAGGAAACAGCTATGAC |
|------|-------------------|

**References**

1. Ivanova NV, Zemlak TS, Hanner RH, Hebert PDN. Universal primer cocktails for fish DNA barcoding. Mol Ecol Notes. 2007; 7: 544-548. doi: 10.1111/j.1471-8286.2007.01748.x.
2. Messing J. New M13 vectors for cloning. Methods Enzymol. 1983; 101: 20-78.
