# Supplementary material
Source: publisher figshare collection journal article supplement (https://plos.figshare.com/articles/dataset/_/5275351)
Supplement: Supplementary file 1 [file 1 › pone.0182503.s008.pdf]

**S3 Table. List of non-gobiid taxa identified in the samples.** List of non-gobiid taxa identified in the samples by integrative taxonomy (X: mean annual abundance in larvae m<sup>-2</sup>, %FO: percentage of frequency of occurrence in each station). Taxa with no occurrence in the Red Sea according to an updated checklist of Red Sea fishes [1] and/or the Red Sea FishBase [2] are indicated with (\*). Taxa identified based only on morphological characters are indicated with (M) and comments on species naming are indicated with superscripts.

| Order           | Family          | Sub-Family level                     | Inshore |     | Offshore |     |
|-----------------|-----------------|--------------------------------------|---------|-----|----------|-----|
|                 |                 |                                      | X       | FO% | X        | FO% |
| Anguiliformes   | Congridae       | Congridae sp.                        | 0.01    | 8   | -        | -   |
|                 |                 | <i>Uroconger</i> sp.                 | -       | -   | 0.02     | 8   |
| Aulopiformes    | Paralepididae   | <i>Lestrolepis</i> sp.               | 0.05    | 17  | 0.29     | 25  |
|                 | Synodontidae    | <i>Harpadon squamosus</i> *          | 0.01    | 8   | 0.02     | 8   |
|                 |                 | <i>Saurida undosquamis</i>           | 0.02    | 8   | 0.01     | 8   |
|                 |                 | <i>Synodus variegatus</i>            | 0.05    | 25  | 0.04     | 8   |
|                 |                 |                                      |         |     |          |     |
| Beryciformes    | Holocentridae   | <i>Myripristis murdjan</i>           | 0.01    | 8   | 0.06     | 17  |
|                 |                 | <i>Myripristis chryseres</i>         | -       | -   | 0.02     | 8   |
|                 |                 | <i>Myripristis</i> sp.               | 0.02    | 8   | 0.02     | 17  |
|                 |                 | <i>Ostichthys kaianus</i> *          | 0.01    | 8   | 0.01     | 8   |
|                 |                 | Holocentridae sp.                    | -       | -   | 0.02     | 8   |
|                 |                 | Unidentified Holocentridae           | -       | -   | 0.02     | 8   |
| Clupeiformes    | Clupeidae       | Clupeidae sp.                        | -       | -   | 0.02     | 8   |
|                 |                 | <i>Spratelloides gracilis</i>        | 1.50    | 75  | 0.91     | 83  |
|                 | Engraulidae     | Engraulidae sp.                      | 0.08    | 17  | 0.04     | 8   |
|                 |                 | <i>Thryssa baelama</i>               | -       | -   | 0.02     | 8   |
| Gadiformes      | Bregmacerotidae | <i>Bregmaceros</i> sp.               | 0.03    | 8   | 0.51     | 75  |
| Gobiesociformes | Gobiesocidae    | Gobiesocidae sp. (M)                 | 0.05    | 17  | -        | -   |
| Lophiiformes    | Antenarriidae   | <i>Antennarius coccineus</i>         | -       | -   | 0.01     | 8   |
| Myctophiformes  | Myctophidae     | <i>Benthoosema</i> spp.              | 0.73    | 50  | 2.78     | 92  |
| Ophidiformes    | Ophididae       | <i>Brotula</i> sp. (M)               | -       | -   | 0.01     | 8   |
| Perciformes     | Acanthuridae    | <i>Acanthurus sohal</i>              | -       | -   | 0.08     | 8   |
|                 |                 | <i>Ctenochaetus striatus</i>         | -       | -   | 0.02     | 17  |
|                 |                 | <i>Naso elegans</i>                  | -       | -   | 0.02     | 8   |
|                 |                 |                                      |         |     |          |     |
|                 |                 |                                      |         |     |          |     |
|                 |                 |                                      |         |     |          |     |
|                 | Apogonidae      | <i>Apogon coccineus</i>              | 0.17    | 17  | 0.01     | 8   |
|                 |                 | <i>Apogon erythrinus</i> *           | 0.14    | 33  | 0.01     | 8   |
|                 |                 | <i>Apogon guamensis</i> <sup>1</sup> | 0.07    | 8   | -        | -   |
|                 |                 | Apogonidae sp. 1                     | -       | -   | 0.08     | 17  |
|                 |                 | Apogonidae sp. 2                     | 0.05    | 17  | -        | -   |
|                 |                 | Apogonidae sp. 3                     | 0.46    | 75  | 0.17     | 33  |
|                 |                 | Apogonidae sp. 4                     | 0.07    | 25  | -        | -   |
|                 |                 | Apogonidae sp. 5                     | 0.03    | 17  | 0.02     | 17  |
|                 |                 | Apogonidae sp. 6                     | 0.01    | 8   | 0.04     | 17  |
|                 |                 | Apogonidae sp. 7                     | 0.03    | 17  | 0.09     | 25  |
|                 |                 | Apogonidae sp. 8                     | 0.05    | 8   | 0.01     | 8   |
|                 |                 | Apogonidae sp. 9                     | 0.53    | 75  | 0.24     | 42  |
|                 |                 | Apogonidae sp. 10                    | -       | -   | 0.04     | 17  |

S3 Table continued

| Order | Family        | Taxa                                 | Inshore |     | Offshore |     |
|-------|---------------|--------------------------------------|---------|-----|----------|-----|
|       |               |                                      | X       | FO% | X        | FO% |
|       |               | Apogonidae sp. 11                    | 0.05    | 25  | -        | -   |
|       |               | Apogonidae sp. 12                    | 0.11    | 17  | -        | -   |
|       |               | Apogonidae sp. 13                    | 0.01    | 8   | -        | -   |
|       |               | Apogonidae sp. 14                    | 0.04    | 8   | -        | -   |
|       |               | Apogonidae sp. 15                    | 0.13    | 17  | -        | -   |
|       |               | Apogonidae sp. 16                    | -       | -   | 0.06     | 25  |
|       |               | Apogonidae sp. 17                    | 0.26    | 42  | 0.06     | 17  |
|       |               | Apogonidae sp. 18                    | 0.01    | 8   | -        | -   |
|       |               | Apogonidae sp. 19                    | 0.03    | 17  | 0.02     | 8   |
|       |               | Apogonidae sp. 20                    | 0.16    | 33  | 0.02     | 8   |
|       |               | Apogonidae sp. 21                    | 0.57    | 67  | 0.35     | 67  |
|       |               | Apogonidae sp. 22                    | 1.29    | 83  | 1.24     | 92  |
|       |               | Apogonidae sp. 23                    | 0.05    | 17  | -        | -   |
|       |               | Apogonidae sp. 24                    | 0.09    | 25  | 0.20     | 50  |
|       |               | Apogonidae sp. 25                    | 0.11    | 25  | 0.07     | 33  |
|       |               | <i>Fowleria vaiulae</i>              | 0.19    | 25  | 0.10     | 33  |
|       |               | <i>Fowleria isostigma</i>            | 0.08    | 25  | 0.01     | 8   |
|       |               | <i>Fowleria marmorata</i>            | 0.10    | 33  | 0.54     | 83  |
|       |               | <i>Jaydia smithi</i>                 | 0.08    | 42  | -        | -   |
|       |               | <i>Ostorhinchus apogonoides</i>      | 0.05    | 8   | 0.12     | 33  |
|       |               | <i>Ostorhinchus nigrofasciatus</i>   | 0.05    | 8   | -        | -   |
|       |               | <i>Pristiapogon exostigma</i>        | 0.11    | 25  | 0.07     | 25  |
|       |               | <i>Pristiapogon fraenatus</i>        | 0.01    | 8   | -        | -   |
|       |               | <i>Pristiapogon kallopterus</i>      | 0.08    | 25  | -        | -   |
|       |               | <i>Rhabdamia spilota</i>             | 0.22    | 25  | -        | -   |
|       |               | <i>Taeniamia</i> sp.                 | 0.73    | 50  | 0.05     | 17  |
|       |               | Unidentified apogonids               | 0.27    | 50  | -        | -   |
|       | Blenniidae    | <i>Blenniella periophthalmus</i>     | 0.07    | 33  | 0.11     | 33  |
|       |               | Blenniidae sp. 1                     | 0.36    | 25  | 0.04     | 8   |
|       |               | Blenniidae sp. 2                     | 0.03    | 8   | -        | -   |
|       |               | Blenniidae sp. 3                     | 0.01    | 8   | 0.02     | 8   |
|       |               | <i>Cirripectes castaneus</i>         | 0.03    | 8   | 0.04     | 17  |
|       |               | <i>Ecsenius nalolo</i> <sup>2</sup>  | 0.03    | 8   | -        | -   |
|       |               | <i>Meiacanthus cf. nigrolineatus</i> | 0.10    | 25  | 0.01     | 8   |
|       |               | <i>Petroscirtes mitratus</i>         | 0.09    | 17  | -        | -   |
|       |               | Unidentified blennids                | 0.03    | 8   | -        | -   |
|       | Caesionidae   | <i>Caesio lunaris</i>                | 0.07    | 8   | 0.05     | 17  |
|       |               | <i>Caesio cf. caeruleaurea</i>       | 3.14    | 50  | 1.03     | 75  |
|       |               | <i>Gymnoaesio gymnoptera</i>         | 0.03    | 8   | 0.05     | 25  |
|       |               | <i>Pterocaesio</i> sp.               | 0.01    | 8   | -        | -   |
|       | Callionymidae | Callionymidae sp. 1                  | 0.01    | 8   | -        | -   |
|       |               | Callionymidae sp. 2                  | -       | -   | 0.02     | 8   |

S3 Table continued

| Order | Family         | Taxa                                      | Inshore |     | Offshore |     |
|-------|----------------|-------------------------------------------|---------|-----|----------|-----|
|       |                |                                           | X       | FO% | X        | FO% |
|       |                | Callionymidae sp. 3                       | 0.06    | 17  | 0.01     | 8   |
|       |                | <i>Callionymus filamentosus</i>           | 0.02    | 8   | -        | -   |
|       |                | Unidentified callionymids                 | 0.03    | 8   | 0.02     | 8   |
|       | Carangidae     | <i>Atule mate</i>                         | -       | -   | 0.01     | 8   |
|       |                | Carangidae sp. 1                          | 0.03    | 8   | 0.02     | 17  |
|       |                | Carangidae sp. 2 (M)                      | -       | -   | 0.01     | 8   |
|       |                | <i>Carangoides fulvoguttatus</i>          | 0.03    | 8   | -        | -   |
|       |                | <i>Alectis ciliaris</i>                   | 0.03    | 8   | -        | -   |
|       |                | <i>Carangoides</i> sp.                    | -       | -   | 0.02     | 8   |
|       |                | <i>Decapterus russelli</i>                | 0.03    | 8   | -        | -   |
|       |                | <i>Gnathanodon speciosus</i>              | 0.02    | 8   | -        | -   |
|       |                | <i>Megalaspis cordyla</i>                 | 0.01    | 8   | -        | -   |
|       |                | <i>Selar crumenophthalmus</i>             | 0.07    | 8   | -        | -   |
|       |                | Unidentified carangids                    | 0.01    | 8   | -        | -   |
|       | Chaetodontidae | Chaetodontidae sp.                        | 0.01    | 8   | -        | -   |
|       | Chanidae       | Chanidae sp. (M)                          | -       | -   | 0.02     | 8   |
|       | Cirrhitidae    | <i>Cirrhitus spilotoceps</i> <sup>3</sup> | 0.01    | 8   | -        | -   |
|       | Echeneidae     | <i>Echeneidae</i> sp.                     | -       | -   | 0.02     | 8   |
|       | Ephippidae     | <i>Platax orbicularis</i>                 | -       | -   | 0.02     | 8   |
|       | Gempylidae     | <i>Neoepinnula orientalis</i> *           | -       | -   | 0.02     | 8   |
|       | Gerreidae      | <i>Gerres oyena</i>                       | 0.10    | 50  | 0.01     | 8   |
|       | Haemulidae     | <i>Pomadasys stridens</i>                 | 0.03    | 8   | -        | -   |
|       | Labridae       | <i>Cheilinus fasciatus</i>                | 0.01    | 8   | 0.06     | 17  |
|       |                | <i>Cheilinus undulatus</i>                | -       | -   | 0.02     | 8   |
|       |                | <i>Chelio inermis</i>                     | -       | -   | 0.03     | 8   |
|       |                | <i>Epibulus insidiator</i>                | 0.08    | 17  | -        | -   |
|       |                | <i>Gomphosus caeruleus</i>                | -       | -   | 0.09     | 8   |
|       |                | <i>Halichoeres hortulanus</i>             | -       | -   | 0.09     | 17  |
|       |                | <i>Halichoeres scapularis</i>             | 0.04    | 17  | 0.07     | 25  |
|       |                | <i>Hologymnosus annulatus</i>             | 0.03    | 8   | -        | -   |
|       |                | Labridae sp. 1                            | 0.68    | 58  | 0.19     | 42  |
|       |                | Labridae sp. 2                            | 0.01    | 8   | -        | -   |
|       |                | Labridae sp. 3                            | 0.08    | 33  | 0.05     | 25  |
|       |                | Labridae sp. 4                            | 0.04    | 25  | -        | -   |
|       |                | <i>Labroides dimidiatus</i>               | 0.01    | 8   | -        | -   |
|       |                | <i>Larabicus quadrilineatus</i>           | 0.03    | 17  | 0.04     | 17  |
|       |                | <i>Oxycheilinus digramma</i>              | 0.01    | 8   | 0.04     | 8   |
|       |                | <i>Paracheilinus octotaenia</i>           | 0.14    | 33  | 0.11     | 25  |
|       |                | <i>Pseudocheilinus hexataenia</i>         | 0.05    | 17  | 0.02     | 8   |
|       |                | <i>Pseudocheilinus evanidus</i>           | -       | -   | 0.21     | 25  |
|       |                | <i>Thalassoma lutescens</i> *             | 0.05    | 17  | 0.07     | 8   |
|       |                | <i>Wetmorella nigropinnata</i>            | 0.11    | 33  | 0.08     | 17  |

S3 Table continued

| Order | Family         | Taxa                                   | Inshore |     | Offshore |     |
|-------|----------------|----------------------------------------|---------|-----|----------|-----|
|       |                |                                        | X       | FO% | X        | FO% |
|       |                | Unidentified labrids                   | 0.01    | 8   | 0.05     | 25  |
|       | Leiognathidae  | Leiognathidae sp.                      | -       | -   | 0.02     | 8   |
|       |                | <i>Photopectoralis bindus</i>          | 0.03    | 8   | -        | -   |
|       | Lethrinidae    | <i>Lethrinus harak</i>                 | 0.02    | 17  | 0.04     | 8   |
|       |                | <i>Lethrinus lentjan</i>               | 0.03    | 17  | 0.05     | 17  |
|       |                | <i>Lethrinus mahsena</i>               | 0.03    | 8   | 0.04     | 8   |
|       |                | <i>Lethrinus obsoletus</i>             | 0.04    | 8   | 0.01     | 8   |
|       |                | <i>Lethrinus</i> sp. 1                 | 0.08    | 17  | 0.03     | 17  |
|       |                | <i>Lethrinus</i> sp. 2                 | -       | -   | 0.01     | 8   |
|       |                | <i>Lethrinus</i> spp.                  | 0.12    | 25  | 0.03     | 17  |
|       | Lutjanidae     | <i>Lutjanus ehrenbergii</i>            | 0.01    | 8   | -        | -   |
|       |                | <i>Lutjanus fulviflamma</i>            | -       | -   | 0.02     | 8   |
|       | Microdesmidae  | <i>Gunnellichthys monostigma</i>       | 0.02    | 8   | -        | -   |
|       |                | <i>Navigobius vittatus</i> *           | 0.03    | 17  | 0.04     | 8   |
|       |                | <i>Ptereleotris evides</i>             | 0.03    | 8   | -        | -   |
|       |                | <i>Ptereleotris monoptera</i> *        | 0.15    | 42  | 0.08     | 25  |
|       |                | Microdesmidae sp.                      | -       | -   | 0.02     | 8   |
|       | Monodactylidae | Monodactylidae sp. (M)                 | 0.01    | 8   | -        | -   |
|       | Mullidae       | <i>Upeneus luzonius</i> * <sup>4</sup> | 0.03    | 8   | -        | -   |
|       | Nemipteridae   | <i>Nemipterus bipunctatus</i>          | 0.03    | 8   | -        | -   |
|       |                | <i>Nemipterus japonicus</i>            | 0.10    | 25  | -        | -   |
|       |                | <i>Scolopsis ghanam</i>                | 0.01    | 8   | 0.01     | 8   |
|       |                | <i>Nemipteridae</i> spp.               | 0.07    | 8   | -        | -   |
|       | Nomeidae       | <i>Cubiceps</i> sp.*                   | -       | -   | 0.06     | 17  |
|       | Pempheridae    | <i>Parapriacanthus ransonneti</i>      | 0.07    | 8   | -        | -   |
|       | Pinguipedidae  | <i>Parapercis hexophtalma</i>          | -       | -   | 0.02     | 8   |
|       | Pomacanthidae  | <i>Centropyge multispinis</i>          | -       | -   | 0.02     | 8   |
|       |                | <i>Genicanthus caudovittatus</i>       | -       | -   | 0.02     | 8   |
|       |                | Pomacanthidae sp.                      | 0.09    | 33  | -        | -   |
|       |                | <i>Pygoplites diacanthus</i>           | -       | -   | 0.05     | 17  |
|       | Pomacentridae  | <i>Abudefduf sexfasciatus</i>          | 0.11    | 25  | 0.01     | 8   |
|       |                | <i>Amblyglyphidodon indicus</i>        | -       | -   | 0.05     | 25  |
|       |                | <i>Amblyglyphidodon flavilatus</i>     | 0.07    | 33  | -        | -   |
|       |                | <i>Chromis dimidiata</i>               | 0.25    | 58  | 0.11     | 17  |
|       |                | <i>Chromis flavaxilla</i>              | 0.04    | 25  | 0.06     | 25  |
|       |                | <i>Chromis viridis</i>                 | 0.05    | 8   | 0.05     | 8   |
|       |                | <i>Chromis weberi</i>                  | -       | -   | 0.01     | 8   |
|       |                | <i>Chrysiptera unimaculata</i>         | 0.20    | 42  | 0.03     | 17  |
|       |                | <i>Dascyllus aruanus</i>               | 0.02    | 8   | -        | -   |
|       |                | <i>Dascyllus marginatus</i>            | 0.03    | 8   | -        | -   |
|       |                | <i>Plectroglyphidodon lacrymatus</i>   | 0.05    | 17  | 0.04     | 8   |
|       |                | <i>Plectroglyphidodon leucozonus</i>   | 0.03    | 17  | -        | -   |

S3 Table continued

| Order | Family          | Taxa                             | Inshore |     | Offshore |     |
|-------|-----------------|----------------------------------|---------|-----|----------|-----|
|       |                 |                                  | X       | FO% | X        | FO% |
|       |                 | <i>Pomacentrus trichourus</i>    | 0.03    | 8   | -        | -   |
|       |                 | <i>Stegastes nigricans</i>       | 0.27    | 58  | 0.31     | 50  |
|       |                 | Pomacentridae sp. 1              | 0.04    | 8   | -        | -   |
|       |                 | Pomacentridae sp. 2              | 0.06    | 25  | 0.10     | 33  |
|       |                 | Unidentified pomacentrids        | 0.01    | 8   | -        | -   |
|       | Priacanthidae   | <i>Priacanthus hamrur</i>        | -       | -   | 0.04     | 8   |
|       |                 | Priacanthidae sp.                | 0.01    | 8   | 0.11     | 17  |
|       |                 | Unidentified priacanthids        | -       | -   | 0.04     | 17  |
|       | Pseudochromidae | <i>Pseudochromis olivaceus</i>   | 0.33    | 17  | -        | -   |
|       |                 | <i>Chlidichthys auratus</i>      | 0.21    | 42  | 0.02     | 8   |
|       |                 | Pseudochromidae sp. 1            | 0.03    | 8   | -        | -   |
|       |                 | Pseudochromidae sp. 2            | 0.20    | 25  | -        | -   |
|       |                 | Pseudochromidae sp. 3            | 0.15    | 17  | -        | -   |
|       | Scaridae        | <i>Calotomus viridescens</i>     | 0.09    | 17  | 0.05     | 17  |
|       |                 | <i>Cetoscarus bicolor</i>        | 0.02    | 8   | -        | -   |
|       |                 | <i>Chlorurus sordidus</i>        | 0.64    | 50  | 0.43     | 58  |
|       |                 | <i>Hipposcarus</i> sp.           | 0.79    | 50  | 0.46     | 42  |
|       |                 | <i>Scarus frenatus</i>           | 0.01    | 8   | -        | -   |
|       |                 | <i>Scarus niger</i>              | 0.04    | 8   | 0.31     | 25  |
|       |                 | <i>Scarus psittacus</i>          | 0.01    | 8   | 0.02     | 8   |
|       |                 | <i>Scarus cf. ferrugineus</i>    | 0.33    | 58  | 0.55     | 58  |
|       |                 | <i>Scarus</i> spp.               | 0.06    | 8   | -        | -   |
|       |                 | Unidentified scarids             | 0.07    | 25  | 0.08     | 25  |
|       | Schindleriidae  | <i>Schindleria</i> sp. (M)       | 0.82    | 58  | 0.62     | 75  |
|       | Scombridae      | <i>Grammatorcynus bilineatus</i> | 0.05    | 17  | -        | -   |
|       |                 | <i>Katsuwonus pelamis</i>        | 0.01    | 8   | 0.02     | 8   |
|       |                 | <i>Rastrelliger kanagurta</i>    | 0.33    | 33  | 0.06     | 25  |
|       |                 | <i>Scomberomorus commerson</i>   | 0.03    | 8   | 0.02     | 8   |
|       |                 | Scombridae sp. (M)               | 0.02    | 8   | -        | -   |
|       |                 | <i>Thunnus tonggol</i>           | 0.01    | 8   | -        | -   |
|       | Serranidae      | <i>Cephalopholis hemistiktos</i> | 0.07    | 25  | 0.12     | 25  |
|       |                 | <i>Liopropoma lunulatum</i>      | -       | -   | 0.02     | 8   |
|       |                 | <i>Liopropoma</i> sp.            | -       | -   | 0.03     | 17  |
|       |                 | <i>Pseudanthias squamipinnis</i> | 0.03    | 8   | 0.19     | 33  |
|       |                 | Serranidae sp. 1                 | 0.04    | 8   | 0.06     | 8   |
|       |                 | Serranidae sp. 2                 | -       | -   | 0.02     | 8   |
|       |                 | Serranidae sp. 3                 | 0.03    | 8   | 0.02     | 8   |
|       |                 | Unidentified serranids           | -       | -   | 0.01     | 8   |
|       | Siganidae       | <i>Siganus luridus</i>           | 0.03    | 17  | 0.03     | 8   |
|       |                 | Siganidae sp. (M)                | -       | -   | 0.02     | 8   |
|       | Sphyraenidae    | <i>Sphyraena jello</i>           | 0.02    | 8   | -        | -   |
|       |                 | <i>Sphyraena qenie</i>           | 0.03    | 17  | 0.08     | 25  |

| S3 Table continued |                    |                                 | Inshore |     | Offshore |     |
|--------------------|--------------------|---------------------------------|---------|-----|----------|-----|
| Order              | Family             | Taxa                            | X       | FO% | X        | FO% |
| Pleuronectiformes  | Trichiuridae       | <i>Sphyraena</i> spp.           | -       | -   | 0.02     | 8   |
|                    |                    | <i>Tentoriceps</i> sp.          | -       | -   | 0.02     | 8   |
|                    |                    | <i>Trichiurus</i> sp.           | 0.05    | 8   | 0.04     | 17  |
|                    | unind. Perciformes |                                 | 0.07    | 42  | 0.21     | 25  |
|                    | Bothidae           | <i>Arnoglossus</i> sp.          | 0.01    | 8   | 0.01     | 8   |
|                    |                    | Bothidae sp. 1                  | 0.03    | 17  | 0.09     | 17  |
|                    |                    | Bothidae sp. 2                  | 0.01    | 8   | 0.10     | 17  |
|                    |                    | Bothidae sp. 3                  | 0.04    | 17  | -        | -   |
|                    |                    | Bothidae sp. 4                  | -       | -   | 0.02     | 8   |
|                    |                    | Bothidae sp. 5                  | 0.02    | 8   | -        | -   |
|                    |                    | Unidentified bothids            | -       | -   | 0.04     | 17  |
|                    | Soleidae           | <i>Pardachirus marmoratus</i>   | 0.01    | 8   | -        | -   |
|                    |                    | Soleidae sp.                    | 0.01    | 8   | -        | -   |
| Scorpaeniformes    | Hoplichthyidae     | <i>Hoplichthys</i> sp.*(M)      | -       | -   | 0.02     | 8   |
|                    | Platycephalidae    | Platycephalidae sp. (M)         | -       | -   | 0.02     | 8   |
|                    | Scorpaenidae       | <i>Scorpaenopsis longispina</i> | -       | -   | 0.01     | 8   |
|                    |                    | Scorpaenidae sp.                | 0.03    | 8   | -        | -   |
|                    |                    | Unidentified scorpaenids        | 0.01    | 8   | -        | -   |
| Stomiiformes       | Phosichthyidae     | <i>Vinciguerrria</i> sp.        | 0.69    | 50  | 4.45     | 92  |
|                    | Stomiidae          | <i>Astronesthes</i> sp.         | 0.05    | 8   | 0.08     | 25  |
|                    |                    | Stomiidae sp. (M)               | -       | -   | 0.01     | 8   |
| Syngnathiformes    | Fistularidae       | <i>Fistularia commensonnii</i>  | -       | -   | 0.02     | 8   |
|                    | Syngnathidae       | Syngnathidae sp. 1              | 0.03    | 8   | -        | -   |
|                    |                    | Syngnathidae sp. 2              | -       | -   | 0.02     | 8   |
| Tetraodontiformes  | Balistidae         | <i>Balistoides viridescens</i>  | 0.01    | 8   | -        | -   |
|                    |                    | <i>Odonus niger</i>             | 0.03    | 17  | -        | -   |
|                    |                    | <i>Sufflamen chrysopterum</i> * | 0.14    | 17  | 0.02     | 8   |
|                    | Monacanthidae      | <i>Cantherhines pardalis</i>    | -       | -   | 0.02     | 8   |
|                    |                    | <i>Pervagor cf. randalli</i>    | 0.08    | 17  | -        | -   |
|                    |                    | Monacanthidae sp. (M)           | -       | -   | 0.02     | 8   |
|                    |                    | Unidentified monacanthids       | -       | -   | 0.02     | 8   |
|                    | Tetraodontidae     | <i>Arothron diadematus</i>      | -       | -   | 0.01     | 8   |
|                    |                    | <i>Canthigaster solandri</i> *  | 0.05    | 25  | 0.02     | 8   |
|                    |                    | Tetraodontidae sp.              | 0.02    | 8   | -        | -   |
|                    |                    | Triacanthidae sp. (M)           | -       | -   | 0.01     | 8   |
| Zeiformes          | Zeidae             | Zeidae sp. (M)                  | -       | -   | 0.01     | 8   |
|                    |                    | Unidentified fish larvae        | 0.11    | 25  | 0.05     | 17  |

<sup>1</sup>corresponds to *Nectamia fusca* according to WoRMs

<sup>2</sup> likely corresponds to *Ecsenius dentex* according to Golani and Bogorodsky (1)

<sup>3</sup> accepted as *Cirrhitus pinnulatus* according to WoRMs

<sup>4</sup> accepted as *Upeneus sundaicus* according to WoRMs

<sup>5</sup> likely the endemic species *Vinciguerrria mabahis*

## References

1. Golani D, Bogorodsky SV. The fishes of the Red Sea - Reappraisal and updated checklist. Zootaxa. 2010: 1-100. PubMed PMID: WOS:000277812600001.
2. Froese R, Pauly D. FishBase. World Wide Web electronic publication. [www.fishbase.org](http://www.fishbase.org), version (06/2016). 2016.
