# Supplementary material
Source: publisher figshare collection journal article supplement (https://plos.figshare.com/articles/dataset/_/5275351)
Supplement: Supplementary file 1 [file 1 › pone.0182503.s009.pdf]

**S4 Table. List of gobiid taxa identified in the samples.** Gobiid taxa identified by integrative taxonomy (X: mean annual abundance in larvae m<sup>-2</sup>, %FO frequency of occurrence in each station). Taxa with no occurrence in the Red Sea according to an updated checklist of Red Sea fishes [1] and/or the Red Sea FishBase [2] are indicated with (\*). Comments on species naming are indicated with superscripts.

| Taxon                                         | Inshore |     | Offshore |     |
|-----------------------------------------------|---------|-----|----------|-----|
|                                               | X       | %FO | X        | %FO |
| <i>Acentrogobius nebulosus</i>                | 0.03    | 8   | -        | -   |
| <i>Amblyeleotris diagonalis</i>               | 0.04    | 8   | -        | -   |
| <i>Amblyeleotris steinitzi</i>                | 0.03    | 8   | -        | -   |
| <i>Amblyeleotris wheeleri</i>                 | 0.01    | 8   | -        | -   |
| <i>Amblygobius albimaculatus</i>              | 0.87    | 50  | 0.12     | 25  |
| <i>Eviota cf. guttata</i>                     | 0.56    | 58  | 0.69     | 75  |
| <i>Eviota indica</i>                          | 0.09    | 17  | 0.02     | 8   |
| <i>Eviota</i> sp. 'Red Sea 1'                 | 0.27    | 33  | 0.04     | 17  |
| <i>Eviota</i> sp. 'Red Sea 2'                 | 0.43    | 50  | 0.02     | 17  |
| <i>Eviota</i> sp. 'Red Sea 3'                 | 0.44    | 58  | 0.01     | 8   |
| <i>Favonigobius reichei</i>                   | 0.01    | 8   | -        | -   |
| <i>Fusigobius neophytus</i>                   | 0.04    | 8   | -        | -   |
| <i>Gnatholepis scapulostigma</i> <sup>1</sup> | 0.04    | 17  | -        | -   |
| <i>Koumansetta hectori</i>                    | 1.53    | 67  | 0.35     | 58  |
| <i>Lotilia cf. garaciliosa</i>                | 0.20    | 25  | 0.03     | 8   |
| <i>Mahidolia</i> sp.                          | 0.05    | 25  | -        | -   |
| <i>Oxyurichthys ophthalmonema</i> *           | 0.12    | 25  | 0.08     | 33  |
| <i>Oxyurichthys petersii</i>                  | 0.37    | 33  | 0.51     | 75  |
| <i>Paragobiodon cf. echinocephalus</i>        | 0.07    | 17  | 0.03     | 8   |
| <i>Paragobiodon lacunicolus</i> *             | -       | -   | 0.03     | 17  |
| <i>Priolepis cincta</i>                       | 0.08    | 17  | 0.06     | 25  |
| Gobiidae sp. 1                                | 0.99    | 92  | 0.12     | 25  |
| Gobiidae sp. 2                                | 1.00    | 58  | 1.71     | 58  |
| Gobiidae sp. 3                                | 0.12    | 42  | -        | -   |
| Gobiidae sp. 4                                | 0.10    | 17  | -        | -   |
| Gobiidae sp. 5                                | 0.04    | 25  | -        | -   |
| Gobiidae sp. 6                                | 0.04    | 8   | -        | -   |
| Gobiidae sp. 7                                | 0.07    | 25  | -        | -   |
| Gobiidae sp. 8                                | 0.46    | 67  | 0.55     | 58  |
| Gobiidae sp. 9                                | 0.01    | 8   | 0.02     | 8   |
| Gobiidae sp. 10                               | 0.16    | 17  | -        | -   |
| Gobiidae sp. 11                               | 0.03    | 17  | 0.02     | 8   |
| Gobiidae sp. 12                               | 0.01    | 8   | 0.03     | 17  |
| Gobiidae sp. 13                               | 0.03    | 17  | 0.01     | 8   |
| Gobiidae sp. 14                               | 0.20    | 42  | -        | -   |
| Gobiidae sp. 15                               | 0.03    | 8   | -        | -   |

S4 Table continued

| Taxon           | Inshore |     | Offshore |     |
|-----------------|---------|-----|----------|-----|
|                 | X       | %FO | X        | %FO |
| Gobiidae sp. 16 | 0.11    | 33  | 0.01     | 8   |
| Gobiidae sp. 17 | -       | -   | 0.05     | 17  |
| Gobiidae sp. 18 | -       | -   | 0.02     | 8   |
| Gobiidae sp. 19 | 0.06    | 17  | 0.15     | 8   |
| Gobiidae sp. 20 | 0.04    | 8   | -        | -   |
| Gobiidae sp. 21 | 0.14    | 33  | 0.03     | 17  |
| Gobiidae sp. 22 | 2.14    | 92  | 0.59     | 50  |
| Gobiidae sp. 23 | 0.04    | 17  | -        | -   |
| Gobiidae sp. 24 | 0.01    | 8   | -        | -   |
| Gobiidae sp. 25 | 1.70    | 83  | 0.21     | 33  |
| Gobiidae sp. 26 | 0.26    | 33  | 0.02     | 8   |
| Gobiidae sp. 27 | 0.04    | 17  | -        | -   |
| Gobiidae sp. 28 | 0.94    | 42  | 0.30     | 33  |
| Gobiidae sp. 29 | 0.03    | 8   | -        | -   |
| Gobiidae sp. 30 | 0.01    | 8   | -        | -   |
| Gobiidae sp. 31 | 0.07    | 17  | -        | -   |
| Gobiidae sp. 32 | 0.06    | 8   | -        | -   |
| Gobiidae sp. 33 | -       | -   | 0.08     | 17  |
| Gobiidae sp. 34 | 0.21    | 50  | 0.31     | 67  |
| Gobiidae sp. 35 | 0.03    | 8   | 0.03     | 17  |
| Gobiidae sp. 36 | 0.04    | 8   | 0.03     | 8   |
| Gobiidae sp. 37 | 0.08    | 17  | -        | -   |
| Gobiidae sp. 38 | 0.20    | 25  | 0.02     | 8   |
| Gobiidae sp. 39 | 0.32    | 58  | 0.04     | 17  |
| Gobiidae sp. 40 | 0.01    | 8   | -        | -   |
| Gobiidae sp. 41 | -       | -   | 0.14     | 17  |
| Gobiidae sp. 42 | 0.41    | 50  | 0.02     | 8   |
| Gobiidae sp. 43 | 0.21    | 42  | -        | -   |
| Gobiidae sp. 44 | 0.12    | 17  | 0.04     | 8   |
| Gobiidae sp. 45 | 0.01    | 8   | 0.02     | 8   |
| Gobiidae sp. 46 | 0.06    | 17  | 0.04     | 8   |
| Gobiidae sp. 47 | 0.08    | 33  | -        | -   |
| Gobiidae sp. 48 | 0.07    | 8   | -        | -   |
| Gobiidae sp. 49 | 0.23    | 42  | 0.05     | 25  |
| Gobiidae sp. 50 | 0.02    | 8   | -        | -   |
| Gobiidae sp. 51 | 0.43    | 17  | -        | -   |
| Gobiidae sp. 52 | 0.08    | 17  | -        | -   |
| Gobiidae sp. 53 | 0.02    | 8   | -        | -   |
| Gobiidae sp. 54 | 0.02    | 8   | -        | -   |
| Gobiidae sp. 55 | 0.60    | 42  | 0.06     | 8   |
| Gobiidae sp. 56 | -       | -   | 0.05     | 17  |
| Gobiidae sp. 57 | 0.07    | 8   | 0.26     | 17  |

| S4 Table continued |         |     |          |     |
|--------------------|---------|-----|----------|-----|
| Taxon              | Inshore |     | Offshore |     |
|                    | X       | %FO | X        | %FO |
| Gobiidae sp. 58    | 0.05    | 17  | 0.06     | 25  |
| Gobiidae sp. 59    | 0.51    | 67  | 0.24     | 25  |
| Gobiidae sp. 60    | 0.02    | 8   | 0.02     | 8   |
| Gobiidae sp. 61    | 0.02    | 8   | -        | -   |
| Gobiidae sp. 62    | 0.01    | 8   | -        | -   |
| Gobiidae sp. 63    | 0.03    | 8   | -        | -   |
| Gobiidae sp. 64    | 0.01    | 8   | 0.01     | 8   |
| Gobiidae sp. 65    | 0.12    | 17  | -        | -   |
| Gobiidae sp. 66    | 0.01    | 8   | 0.01     | 8   |
| Gobiidae sp. 67    | 1.83    | 67  | 0.38     | 67  |
| Gobiidae sp. 68    | -       | -   | 0.10     | 25  |
| Gobiidae sp. 69    | 0.04    | 17  | -        | -   |
| Gobiidae sp. 70    | 0.06    | 17  | -        | -   |
| Gobiidae sp. 71    | 0.04    | 8   | -        | -   |
| Gobiidae sp. 72    | -       | -   | 0.03     | 8   |
| Gobiidae sp. 73    | 1.53    | 58  | -        | -   |
| Gobiidae sp. 74    | 0.19    | 25  | 0.04     | 8   |
| Gobiidae sp. 75    | 0.13    | 17  | -        | -   |
| Gobiidae sp. 76    | 0.02    | 8   | -        | -   |
| Gobiidae sp. 77    | 0.02    | 8   | -        | -   |
| Gobiidae sp. 78    | 0.01    | 8   | 0.04     | 17  |

<sup>1</sup> accepted as *Gnatholepis cauerensis* according to WoRMs

## References

1. Golani D, Bogorodsky SV. The fishes of the Red Sea - Reappraisal and updated checklist. Zootaxa. 2010;(2463):1-100. PubMed PMID: WOS:000277812600001.
2. Froese R, Pauly D. FishBase. World Wide Web electronic publication. [www.fishbase.org](http://www.fishbase.org), version (06/2016). 2016.
